# Supplementary material for: Missed Opportunities of Flu Vaccination in Italian Target Categories: Insights from the Online EPICOVID 19 Survey
Source: PubMed Central journal article supplement (PMC7712748; doi:10.3390/vaccines8040669), 2020-11-09
Supplement: vaccines-08-00669-s001.pdf [file vaccines-08-00669-s001.pdf]

| <b>Flu shot during 2019/2020 flu season</b> |                               |                               |                                 |
|---------------------------------------------|-------------------------------|-------------------------------|---------------------------------|
| <b>Class of age</b>                         | <b>No<br/>N=157004 (79.0)</b> | <b>Yes<br/>N=41818 (21.0)</b> | <b>Total<br/>N=198822 (100)</b> |
| 18-24                                       | 8916 (89.0)                   | 1099 (11.0)                   | 10,015 (5.0)                    |
| 25-29                                       | 12,965 (87.6)                 | 1839 (12.4)                   | 14,804 (7.4)                    |
| 30-34                                       | 15,539 (87.1)                 | 2311 (12.9)                   | 17,850 (9.0)                    |
| 35-39                                       | 17,049 (85.6)                 | 2864 (14.4)                   | 19,913 (10.0)                   |
| 40-44                                       | 17,260 (85.0)                 | 3036 (15.0)                   | 20,296 (10.2)                   |
| 45-49                                       | 19,391 (86.4)                 | 3055 (13.6)                   | 22,446 (11.3)                   |
| 50-54                                       | 19,848 (86.0)                 | 3235 (14.0)                   | 23,083 (11.6)                   |
| 55-59                                       | 18,753 (81.7)                 | 4195 (18.3)                   | 22,948 (11.5)                   |
| 60-64                                       | 14,200 (73.3)                 | 5175 (26.7)                   | 19,375 (9.7)                    |
| 65-69                                       | 7885 (55.3)                   | 6373 (44.7)                   | 14,258 (7.2)                    |
| 70-74                                       | 3504 (41.1)                   | 5018 (58.9)                   | 8522 (4.3)                      |
| 75-79                                       | 1081 (35.1)                   | 2003 (64.9)                   | 3084 (1.6)                      |
| 80-84                                       | 379 (27.5)                    | 998 (72.5)                    | 1377 (0.7)                      |
| 85-89                                       | 136 (27.0)                    | 367 (73.0)                    | 503 (0.3)                       |
| 90+                                         | 98 (28.2)                     | 250 (71.8)                    | 348 (0.2)                       |

Supplementary Table 1. Vaccination coverage in participants according to the class of age.

|              |             | Flu shot rates by class of age |                       |
|--------------|-------------|--------------------------------|-----------------------|
|              |             | National 2109-2020             | EPICOVID19            |
| Class of age | 18-44 years | 574,335/18,526,934 (3.1)       | 11,149/82,878 (13.5)  |
|              | 45-64 years | 1,749,887/18,227,994 (9.6)     | 15,660/87,852 (17.8)  |
|              | 18-64 years | 2,324,222/36,754,928 (6.3)     | 26,809/170,730 (15.7) |
|              | 65+ years   | 7,615,037/13,946,954 (54.6)    | 15,009/28,092 (53.4)  |
|              | 60-64 years | -                              | 5,175/19,375 (26.7)   |

Supplementary Table 2. Vaccination coverage per class of age according to the Italian official national data and in the EPICOVID19 respondents.

|                       | Age 18-64 years<br>N=26,809/170,730 (15.7) |       | Age ≥ 65 years<br>N=15,009/28,092 (53.4) |       |
|-----------------------|--------------------------------------------|-------|------------------------------------------|-------|
|                       | aOR (95%CI)                                | p     | aOR (95%CI)                              | p     |
| Number of morbidities |                                            |       |                                          |       |
| None                  | 1                                          |       | 1                                        |       |
| One                   | 1.54 (1.49 to 1.59)                        | 0.000 | 1.43 (1.35 to 1.51)                      | 0.000 |
| Two                   | 2.18 (2.05 to 2.33)                        | 0.000 | 1.70 (1.55 to 1.86)                      | 0.000 |
| Three or more         | 2.60 (2.26 to 2.99)                        | 0.000 | 1.66 (1.42 to 1.94)                      | 0.000 |

Supplementary Table 3. Multivariable binary logistic regression analysis on the probability of being or not vaccinated during the 2019/2020 flu season according to the number of reported morbidities.
